# Supplementary material for: C2CD6 regulates targeting and organization of the CatSper calcium channel complex in sperm flagella
Source: Oxford University Press journal article supplement (doi:10.1242/dev.199988), 2021-12-17
Supplement: dev199988supp.pdf [file dev199988supp.pdf]

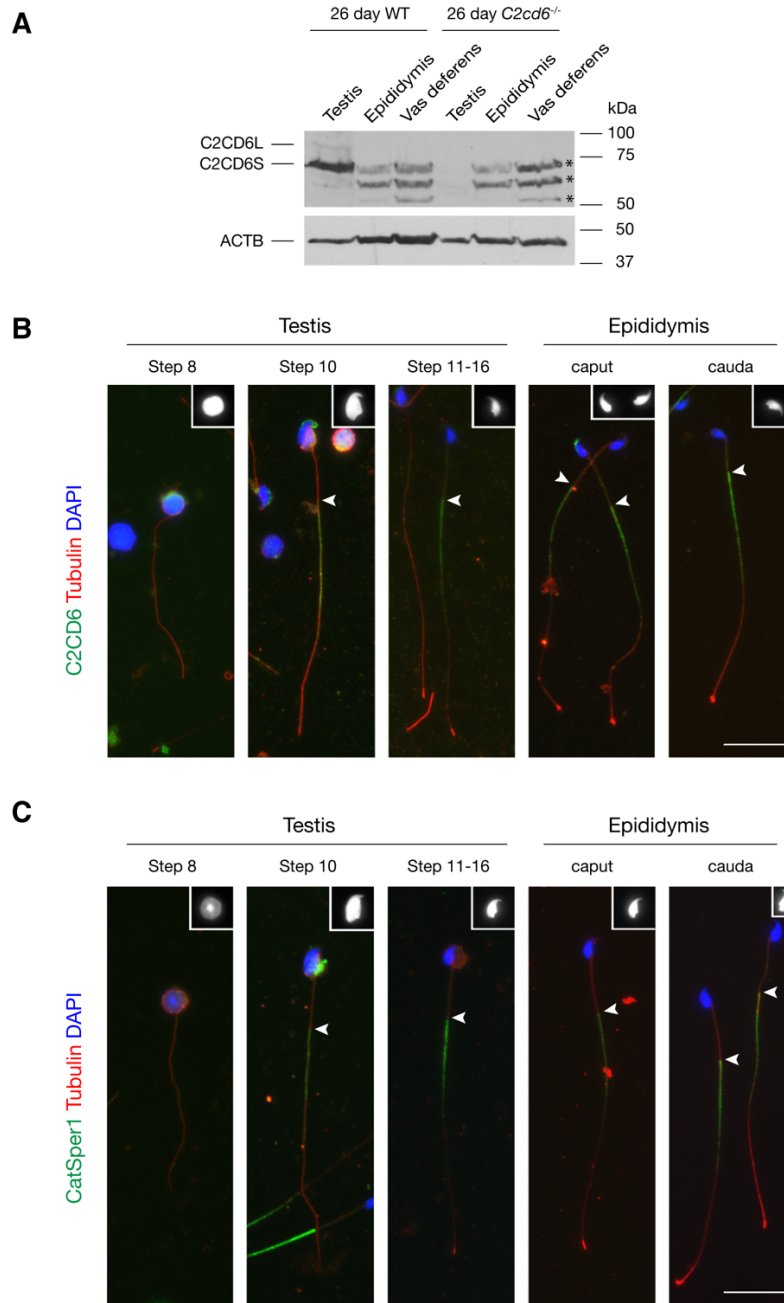

**Fig. S1. Expression and localization of C2CD6 in reproductive tissues and sperm.** (A) Western blot analysis of C2CD6 in testis, epididymis, and vas deferens from 26-day-old wild type and *C2cd6*<sup>-/-</sup> male mice. 26-day-old epididymis lacks sperm. The three bands indicated by asterisks in epididymis and vas deferens are non-specific, since they are absent in the testis but are present in the tissues from the *C2cd6*<sup>-/-</sup> mice. ACTB serves as a loading control. (B) Immunofluorescence analysis of C2CD6 in testicular spermatids and epididymal sperm from 8-week-old wild type mice. (C) Immunofluorescence analysis of CatSper1 in testicular spermatids and epididymal sperm from 8-week-old wild type mice. The steps of testicular spermatids are assigned based on the nuclear and flagellar morphology. Step 8 spermatid is characterized by a round nucleus and a growing flagellum. The nucleus of step 10 spermatid is wide with a hook. The nucleus of step 11-16 spermatids, like that of epididymal sperm, is condensed and narrow. Scale bars, 25  $\mu$ m.

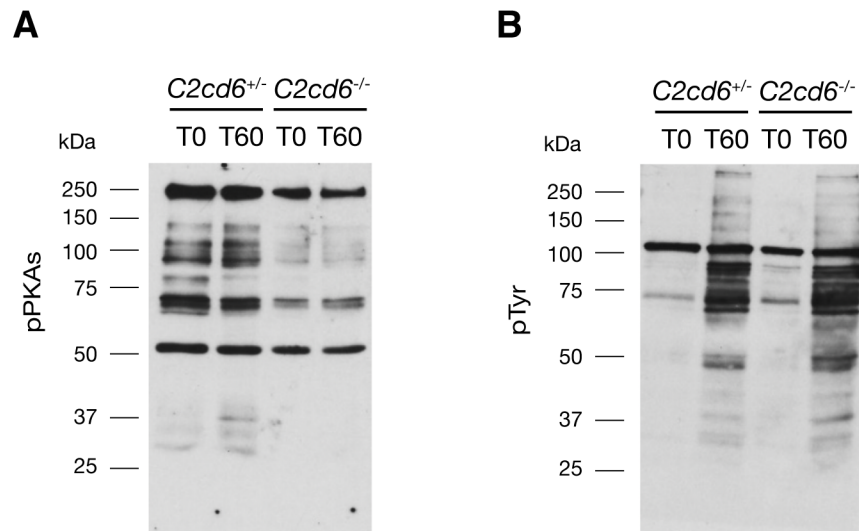

**Fig. S2. Analysis of PKA phosphorylation and tyrosine phosphorylation in sperm before and after capacitation.** Sperm samples from 3-to-4-month-old *C2cd6*<sup>+/-</sup> and *C2cd6*<sup>-/-</sup> males were collected immediately after swim-out (T0) and after 60 minutes of incubation in the capacitation media (T60). (A) Western blot analysis of phosphorylation of PKA substrates with phospho-PKA substrate antibody. (B) Western blot analysis of tyrosine phosphorylation with anti-pTyr antibody. The experiments were performed four times.

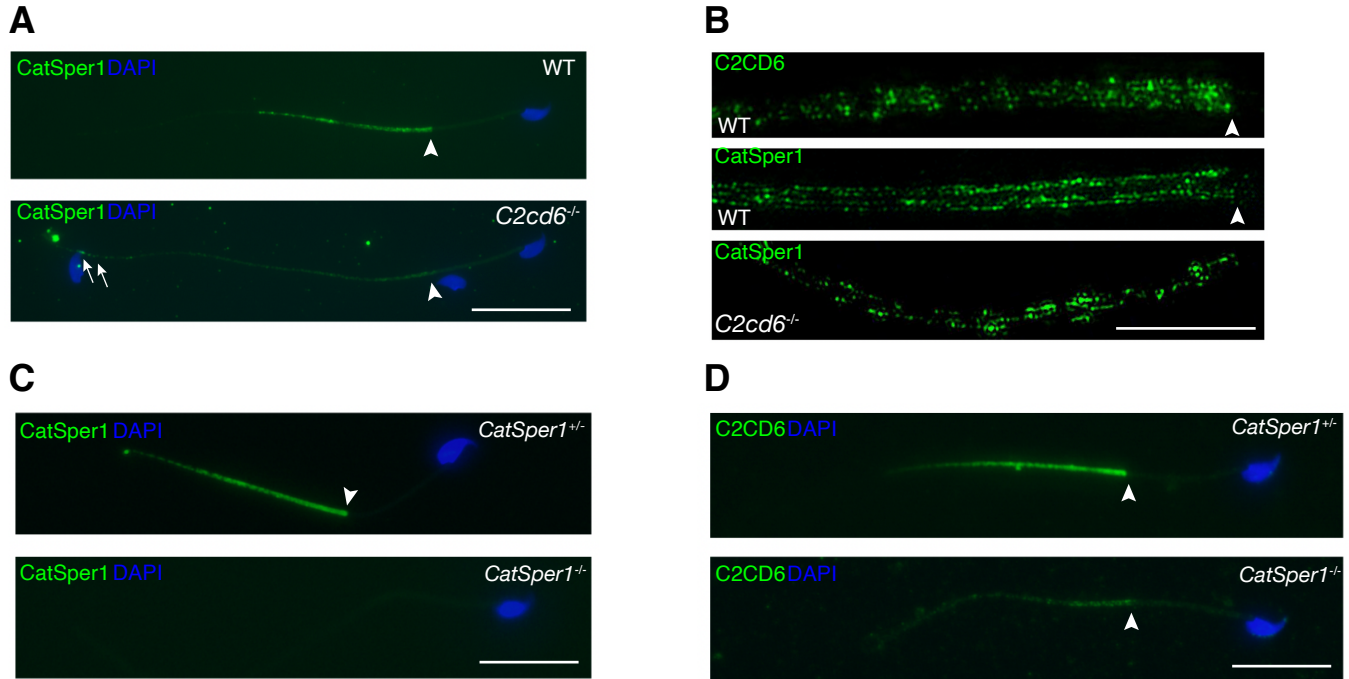

**Fig. S3. Additional immunofluorescence images for Figure 4 (C2CD6 regulates targeting and nanodomain organization of CatSper in sperm flagella).**

(A) Immunofluorescence analysis of CatSper1 in wild type and *C2cd6*-deficient sperm. Arrowhead indicates the annulus. Related to Fig. 4A. Scale bar, 25  $\mu\text{m}$ . (B) Super-resolution localization of C2CD6 and CatSper1 in wild type and *C2cd6*<sup>-/-</sup> sperm. The distal region of the flagellar principal piece of the *C2cd6*<sup>-/-</sup> sperm is shown. Related to Fig. 4B. Scale bar, 5  $\mu\text{m}$ . (C) Immunofluorescence analysis of CatSper1 in *CatSper1*<sup>+/-</sup> and *CatSper1*<sup>-/-</sup> sperm from 3-6 month-old males. Related to Fig. 4F. Scale bar, 25  $\mu\text{m}$ . (D) Immunofluorescence analysis of C2CD6 in *CatSper1*<sup>+/-</sup> and *CatSper1*<sup>-/-</sup> sperm from 3-6 month-old adult males. Related to Fig. 4G. Scale bar, 25  $\mu\text{m}$ .

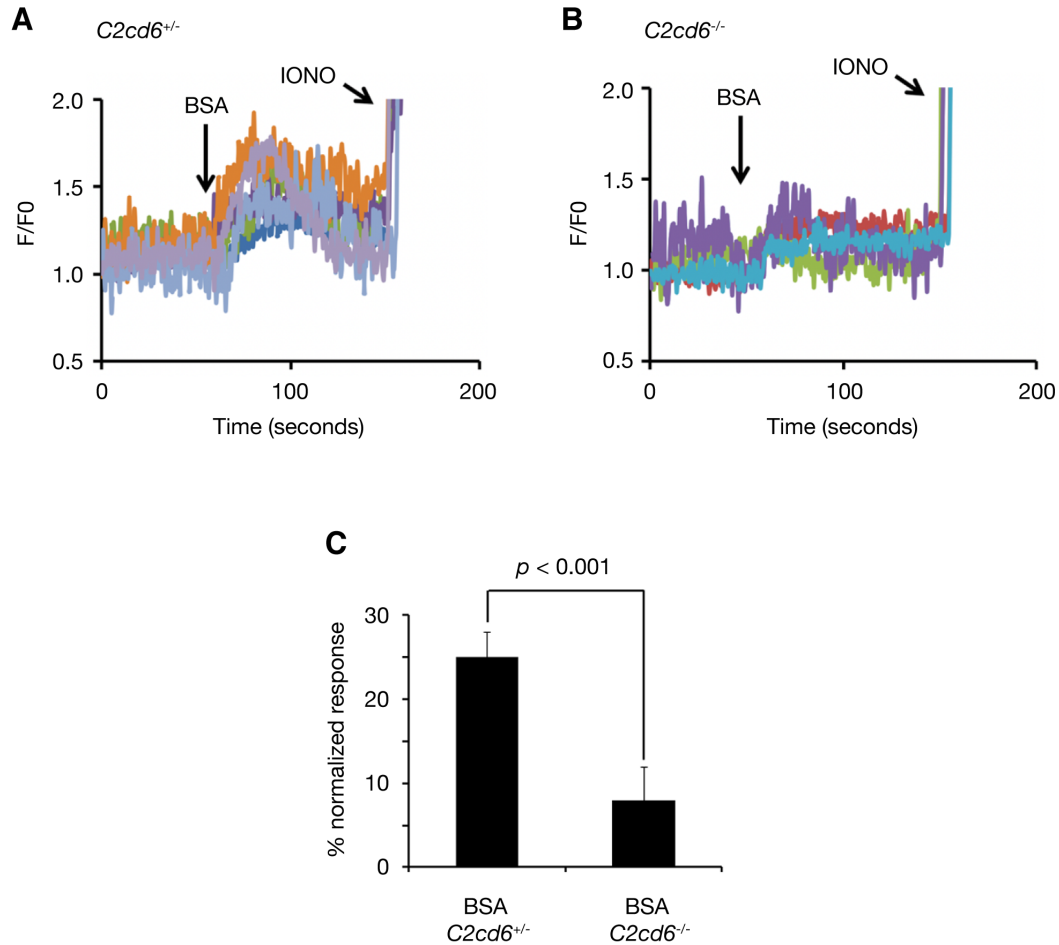

**Fig. S4. BSA induces  $[Ca^{2+}]_i$  increase in mouse sperm.** (A, B) Responses in sperm calcium influx to BSA. Four to five representative single cell fluorescence traces under different experimental conditions are shown. Addition of BSA (5 mg/ml) to sperm from *C2cd6<sup>+/-</sup>* mice (A, five sperm) and from *C2cd6<sup>-/-</sup>* mice (B, four sperm). (C) The average fluorescence increases induced by BSA in 215 sperm from four different *C2cd6<sup>+/-</sup>* males and three *C2cd6<sup>-/-</sup>* males. The heterozygous sperm response is significantly larger than that of the *C2cd6*-null sperm. Statistical analysis was performed by Student's *t*-test.
